# Supplementary material for: Evaluating Long-Term Effectiveness of Managed Aquifer Recharge for Groundwater Recovery and Nitrate Mitigation in an Overexploited Aquifer System
Source: Copernicus journal article supplement (doi:10.5194/hess-30-693-2026), 2026-02-05
Supplement: Supplementary file 1 [file hess-30-693-2026-supplement.pdf]

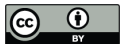

*Supplement of*

## **Evaluating Long-Term Effectiveness of Managed Aquifer Recharge for Groundwater Recovery and Nitrate Mitigation in an Overexploited Aquifer System**

**Yuguang Zhu et al.**

*Correspondence to:* Zhilin Guo ([guozl@sustech.edu.cn](mailto:guozl@sustech.edu.cn))

The copyright of individual parts of the supplement might differ from the article licence.

Table S1. Parameters of reactive transport

|                                                                                                    |         |
|----------------------------------------------------------------------------------------------------|---------|
| Half saturation of NO <sub>3</sub> <sup>-</sup> in NO <sub>3</sub> ->NO <sub>2</sub> (mole/L)      | 1.1e-5  |
| Half saturation of CH <sub>3</sub> COOH <sup>-</sup> in NO <sub>3</sub> ->NO <sub>2</sub> (mole/L) | 2e-4    |
| Inhibition constant of O2 in NO <sub>3</sub> ->NO <sub>2</sub> (mole/L)                            | 1e-5    |
| Rate constant in NO <sub>3</sub> ->NO <sub>2</sub> (mole/L/s)                                      | 1e-9    |
| Half saturation of NO <sub>2</sub> <sup>-</sup> in NO <sub>2</sub> -> N <sub>2</sub> (mole/L)      | 1.13e-5 |
| Half saturation of CH <sub>3</sub> COOH <sup>-</sup> in NO <sub>2</sub> -> N <sub>2</sub> (mole/L) | 2e-5    |
| Inhibition of O2 in NO <sub>2</sub> -> N <sub>2</sub> (mole/L)                                     | 1e-5    |
| Rate constant in NO <sub>2</sub> -> N <sub>2</sub> (mole/L/s)                                      | 2e-10   |

Table S2 Prameters of homogeneous fields

| Zone | hydraulic conductivity (m/d) | Porsity |
|------|------------------------------|---------|
| 1    | 24                           | 0.3     |
| 2    | 16                           | 0.43    |
| 3    | 10                           | 0.45    |
| 4    | 4                            | 0.43    |

Table S3 Prameters of heterogeneous fields

| Material    | hydraulic conductivity (m/d) | Porsity |
|-------------|------------------------------|---------|
| Clay        | 0.01                         | 0.45    |
| Silt        | 5                            | 0.4     |
| Fine sand   | 75                           | 0.35    |
| Medium sand | 250                          | 0.3     |

Table S4. Groundwater water-budget

| mass (kg)               | Storage<br>change     | Pre                   | Irrigation            | western               | southern              | eastern               | Total pumping         |
|-------------------------|-----------------------|-----------------------|-----------------------|-----------------------|-----------------------|-----------------------|-----------------------|
| $T_{end} - T_{initial}$ | 1.69×10 <sup>11</sup> | 5.22×10 <sup>11</sup> | 1.43×10 <sup>11</sup> | 5.04×10 <sup>11</sup> | 5.02×10 <sup>11</sup> | 3.98×10 <sup>11</sup> | -1.9×10 <sup>12</sup> |

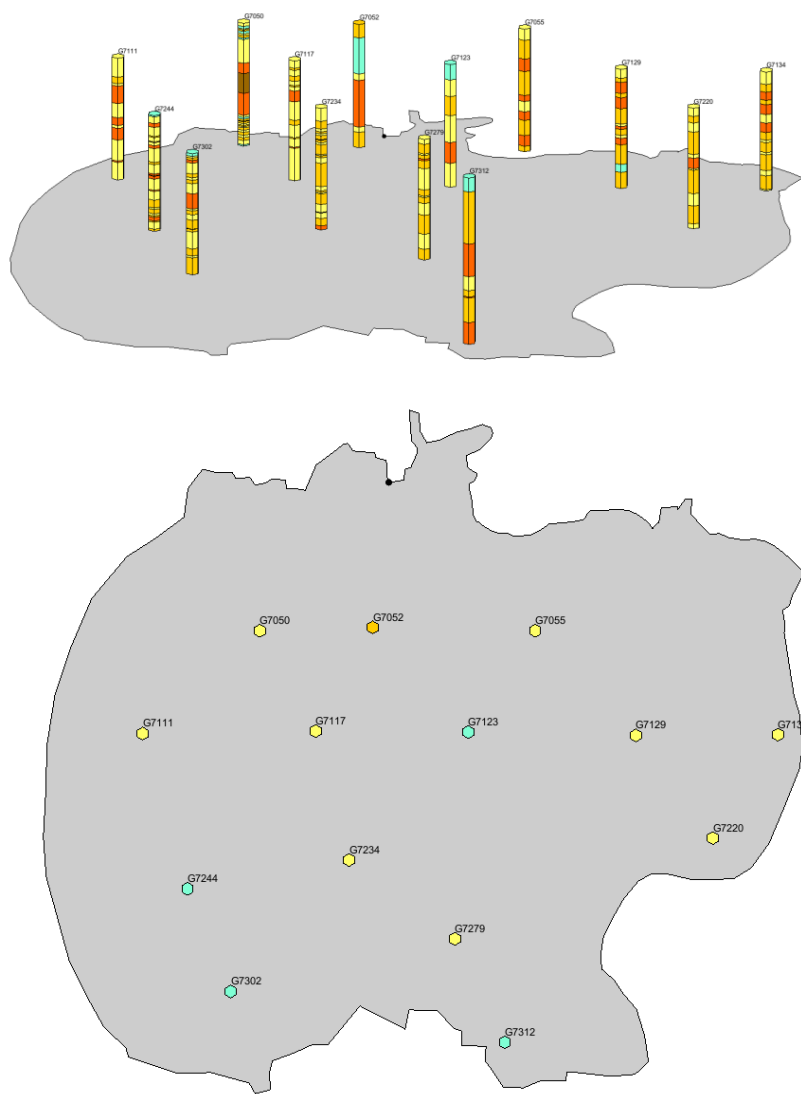

**Figure.S1 Locations of the 14 boreholes within the study area.**

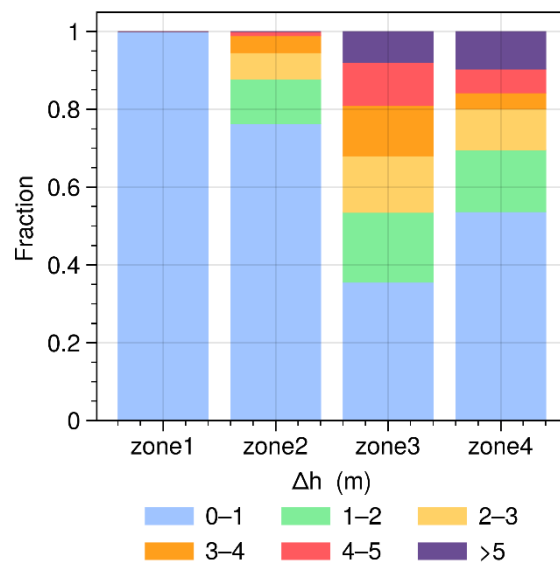

**Figure S2. Distribution of Groundwater Head Recovery ( $\Delta h$ ) Across Zones by 2035**

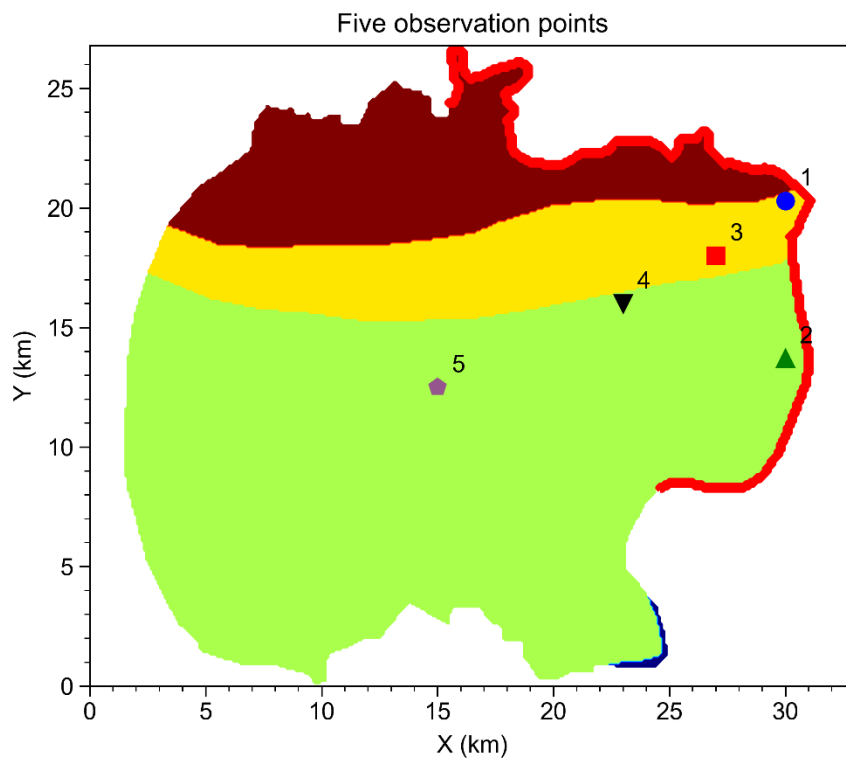

**Figure S3. Spatial Distribution of Zones and Observation Wells**
